# Supplementary material
Source: Springer Nature journal article supplement (https://www.springermedizin.de/resource/supplementary/12959_2006_53_MOESM9_ESM.pdf/9569440)

**A**

20µm

**B**

20µm

**C**

20µm

**D**

20µm

**E**

20µm

**F**

20µm

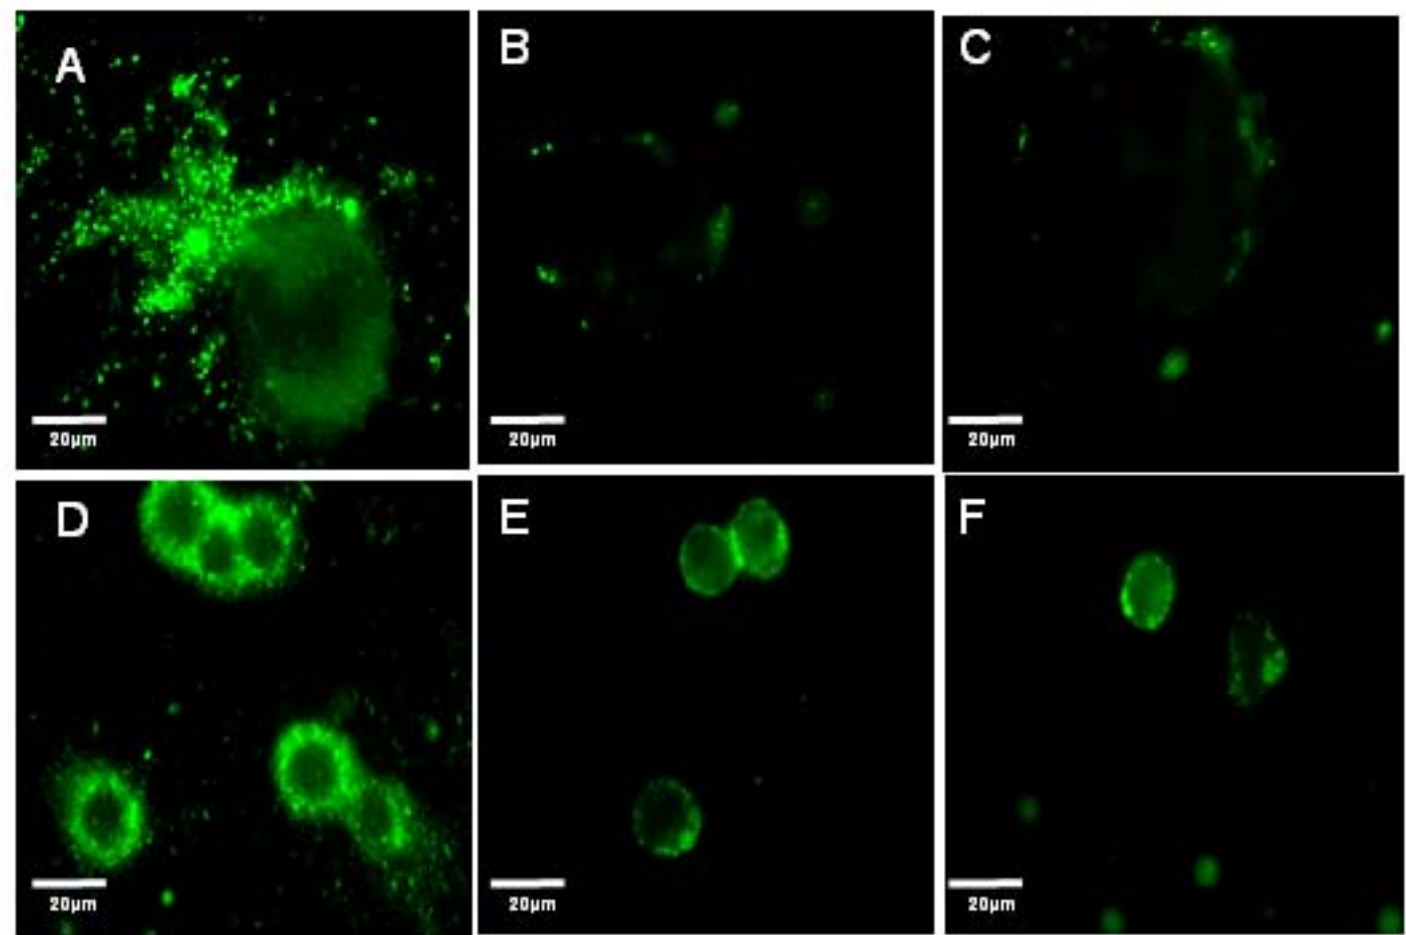

Supplement: MOESM9 [file 9569440]
